# Supplementary material for: Understanding the variability of Australian fire weather between 1973 and 2017
Source: PLOS journal article supplement (doi:10.1371/journal.pone.0222328), 2019-09-19
Supplement: S1 (10.1371/journal.pone.0222328.s001) [file journal.pone.0222328.s001]

**S1 Table. Study periods for seasonal FFDI and weather data**

| FFDI and weather                 | Number of samples | Date ranges                                        |
|----------------------------------|-------------------|----------------------------------------------------|
| DJF FFDI90 and weather variables | 45                | December 1972-Feb 1973 to Dec 2016-February 2017   |
| MAM FFDI90 and weather variables | 45                | March-May 1973 to March-May 2017                   |
| JJA FFDI90 and weather variables | 44                | June-August 1973 to June-August 2016               |
| SON FFDI90 and weather variables | 44                | September-November 1973 to September-November 2016 |
