# Supplementary material for: Understanding the variability of Australian fire weather between 1973 and 2017
Source: PLOS journal article supplement (doi:10.1371/journal.pone.0222328), 2019-09-19
Supplement: S3 (10.1371/journal.pone.0222328.s003) [file journal.pone.0222328.s003]

A map of Australia with numbers indicating the distribution of 30 bird species. The numbers are color-coded: red (1-10), green (11-20), and purple (21-30). The numbers are placed in various regions across the country, with some numbers appearing in multiple locations. For example, the number 31 is in the top center, 55 is in the top right, 43 is in the top right, 65 is in the top right, 46 is in the top right, 33 is in the top right, 49 is in the top right, 37 is in the top right, 30 is in the top right, 25 is in the top right, 23 is in the top right, 35 is in the top right, 29 is in the top right, 26 is in the top right, 23 is in the top right, 39 is in the bottom right, and 29 is in the bottom right.

SON FFDI90-MAM ENSO partial lag=2

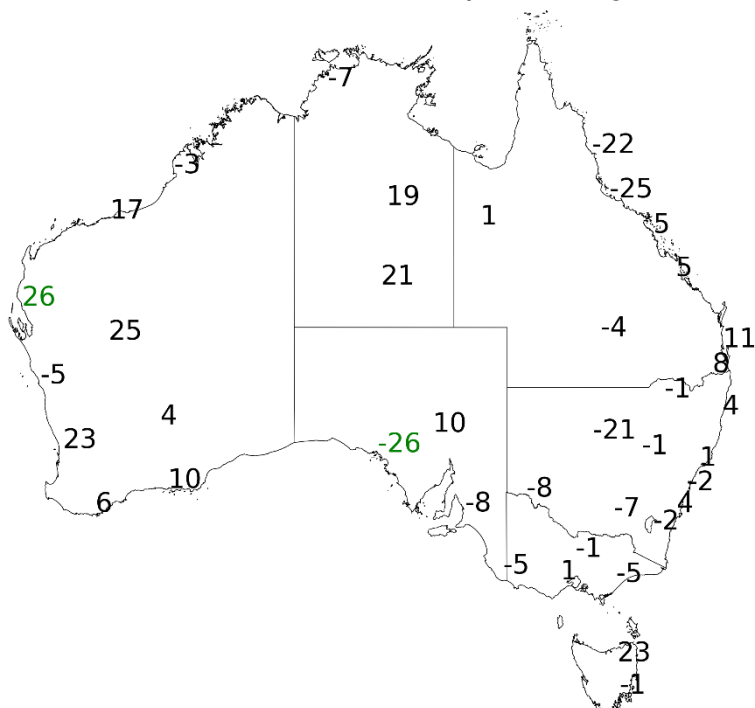

S1 Fig. Correlation coefficient values multiplied by 100 calculated for SON 90<sup>th</sup> percentile FFDI and the preceding a. JJA NINO3.4 (one-season lag) b. MAM NINO3.4 (two-season lag). Significance greater than 99% in red, 95% in magenta and 90% green.
