# Supplementary material for: Understanding the variability of Australian fire weather between 1973 and 2017
Source: PLOS journal article supplement (doi:10.1371/journal.pone.0222328), 2019-09-19
Supplement: S5 (10.1371/journal.pone.0222328.s005) [file journal.pone.0222328.s005]

MAM-Y2 FFDI90-SON ENSO partial lag=2

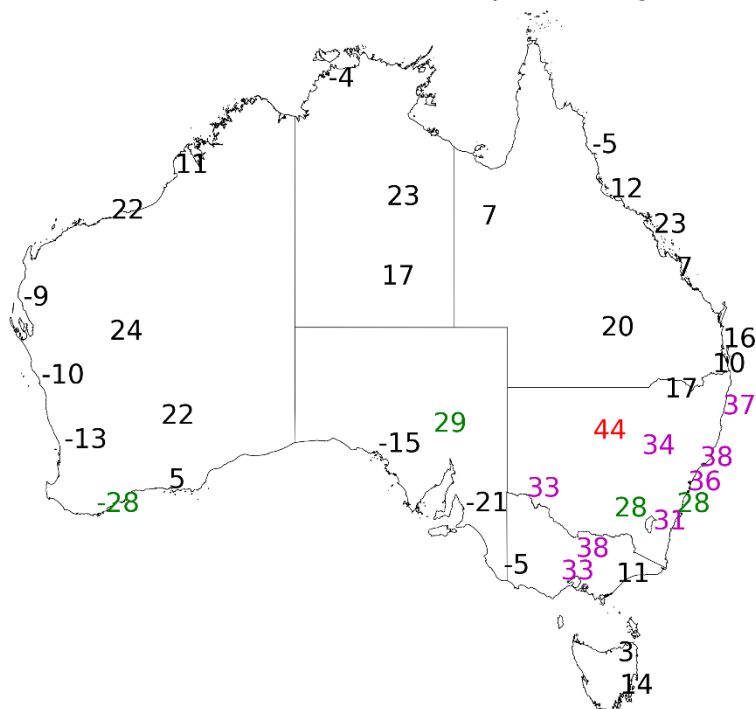

S3 Fig. Correlation coefficient values multiplied by 100 calculated for MAM 90<sup>th</sup> percentile FFDI and the preceding a. DJF NINO3.4 (one-season lag) b. SON NINO3.4 (two-season lag). Significance greater than 99% in red, 95% in magenta and 90% green.
