# Supplementary material for: Understanding the variability of Australian fire weather between 1973 and 2017
Source: PLOS journal article supplement (doi:10.1371/journal.pone.0222328), 2019-09-19
Supplement: S6 (10.1371/journal.pone.0222328.s006) [file journal.pone.0222328.s006]

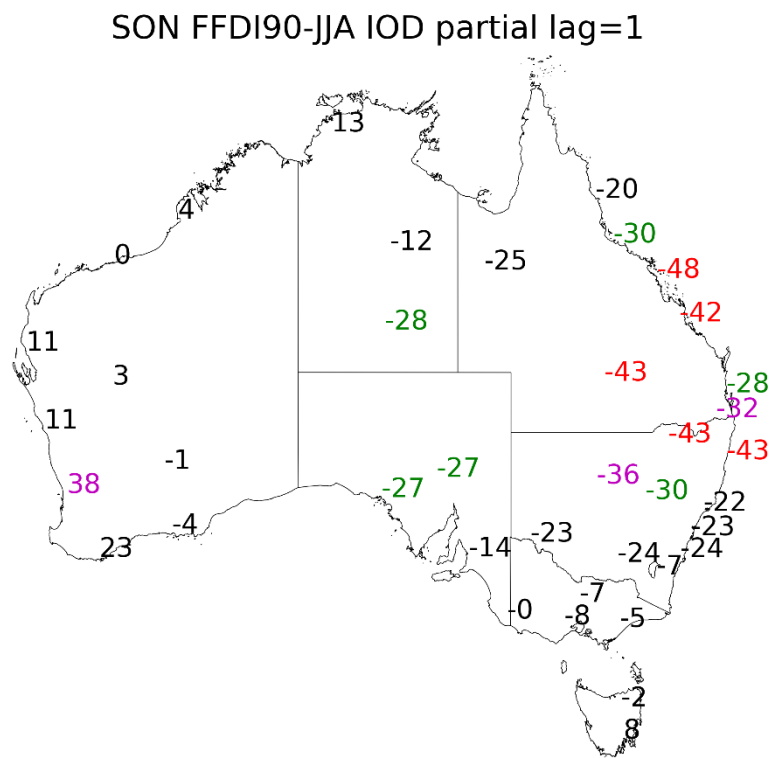

S1 Fig. Correlation coefficient values multiplied by 100 calculated for SON 90<sup>th</sup> percentile FFDI and the preceding JJA DMI (one season lag) (1972 – 2017). Significance greater than 99% in red, 95% in magenta and 90% green.
