# Supplementary material for: Understanding the variability of Australian fire weather between 1973 and 2017
Source: PLOS journal article supplement (doi:10.1371/journal.pone.0222328), 2019-09-19
Supplement: S7 (10.1371/journal.pone.0222328.s007) [file journal.pone.0222328.s007]

SON FFDI90-JJA SAM partial lag=1

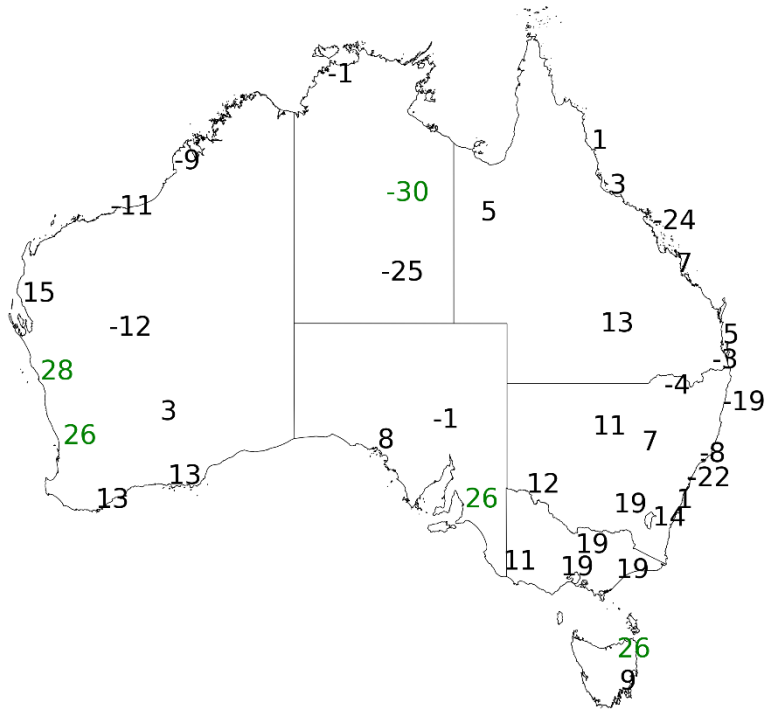

a.

SON FFDI90-MAM SAM partial lag=2

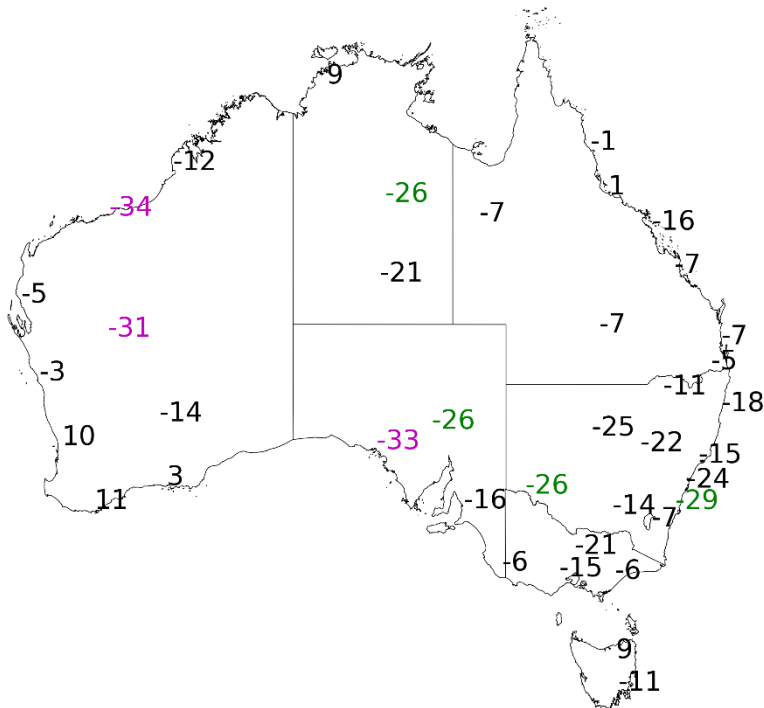

b.

# DJF FFDI90-JJA SAM partial lag=2

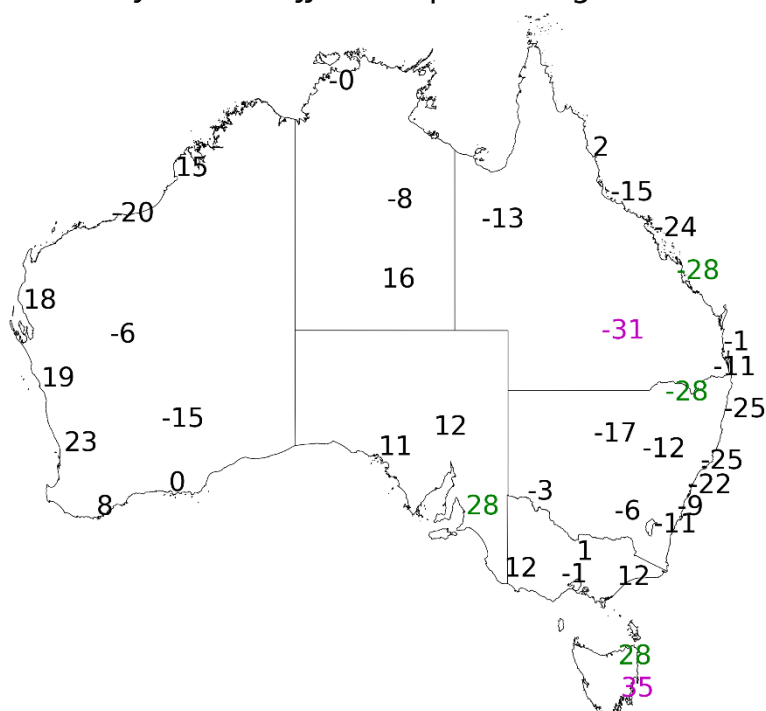

c.

S1 Fig. Correlation coefficient values multiplied by 100 calculated for SON 90<sup>th</sup> percentile FFDI and the preceding a. JJA SAM (one-season lag) b. MAM SAM (two-season lag) c. DJF 90<sup>th</sup> percentile FFDI and the preceding JJA SAM (two-season lag). Significance greater than 99% in red, 95% in magenta and 90% green.
