# Supplementary material for: Understanding the variability of Australian fire weather between 1973 and 2017
Source: PLOS journal article supplement (doi:10.1371/journal.pone.0222328), 2019-09-19
Supplement: S11 (10.1371/journal.pone.0222328.s011) [file journal.pone.0222328.s011]

DJF FFDI90-SON ENSO partial lag=1

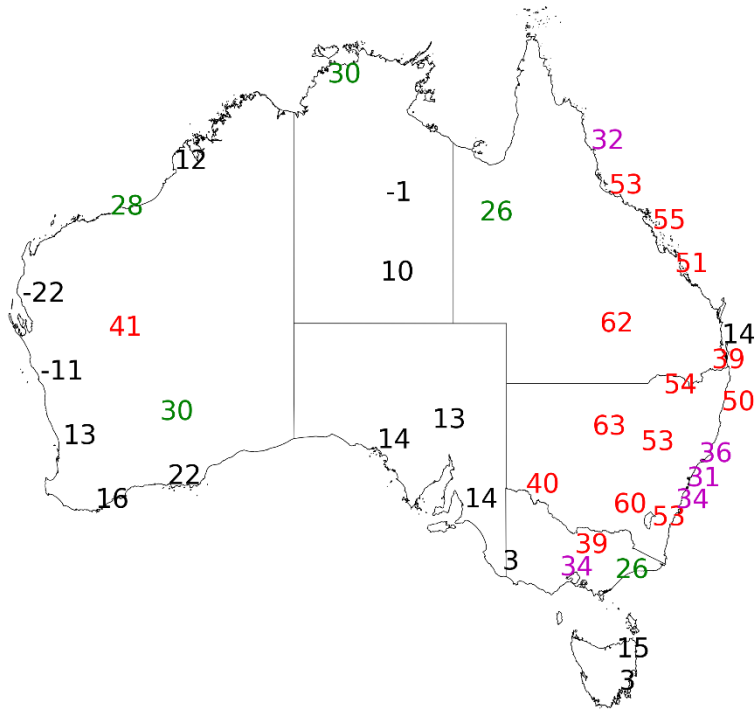

a.

[illegible]

DJF FFDI90-SON IOD partial lag=1

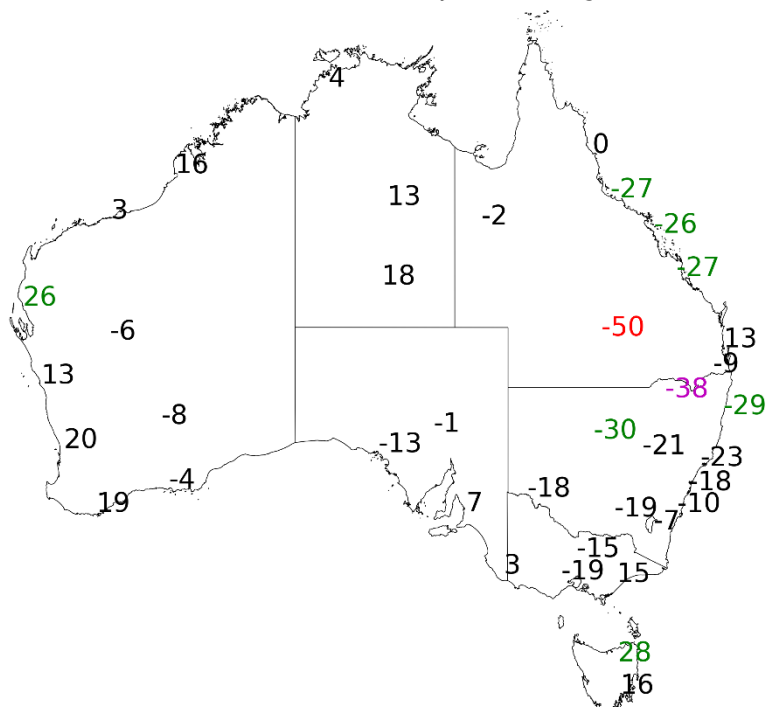

S1 Fig. Partial correlation coefficient values multiplied by 100 for DJF 90<sup>th</sup> percentile FFDI and a. SON NINO3.4 b. SON SAM c. SON IOD (one season lag) (1972 – 2017). Significance greater than 99% in red, 95% in magenta and 90% green.
