# Supplementary material for: Understanding the variability of Australian fire weather between 1973 and 2017
Source: PLOS journal article supplement (doi:10.1371/journal.pone.0222328), 2019-09-19
Supplement: S15 (10.1371/journal.pone.0222328.s015) [file journal.pone.0222328.s015]

DJF FFDI90-JJA ENSO partial lag=2

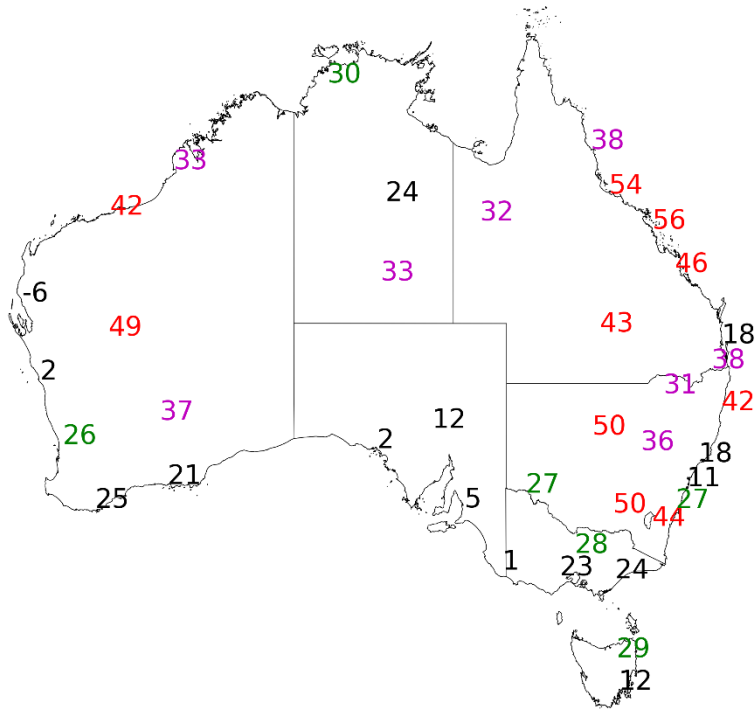

a.

DJF FFDI90-JJA SAM partial lag=2

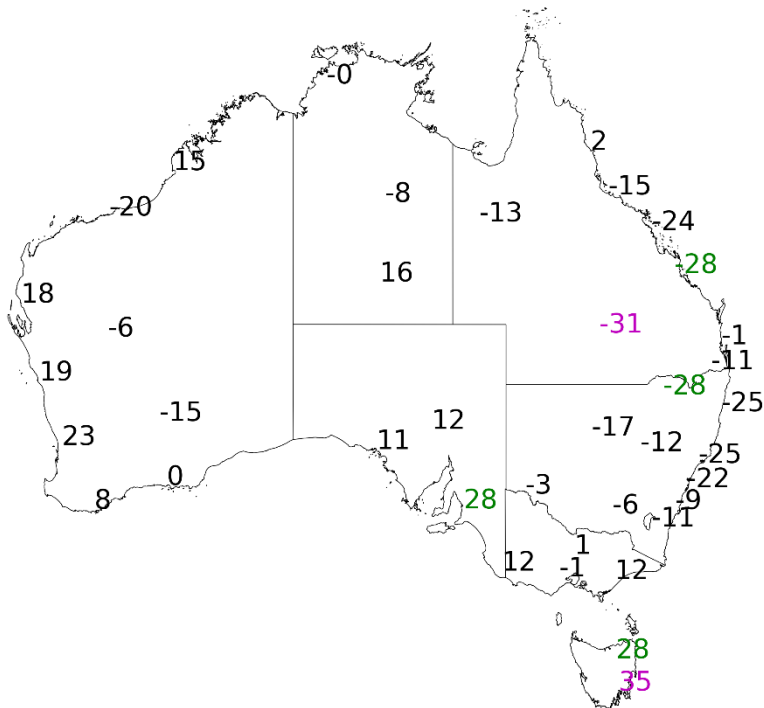

b.

# DJF FFDI90-JJA IOD partial lag=2

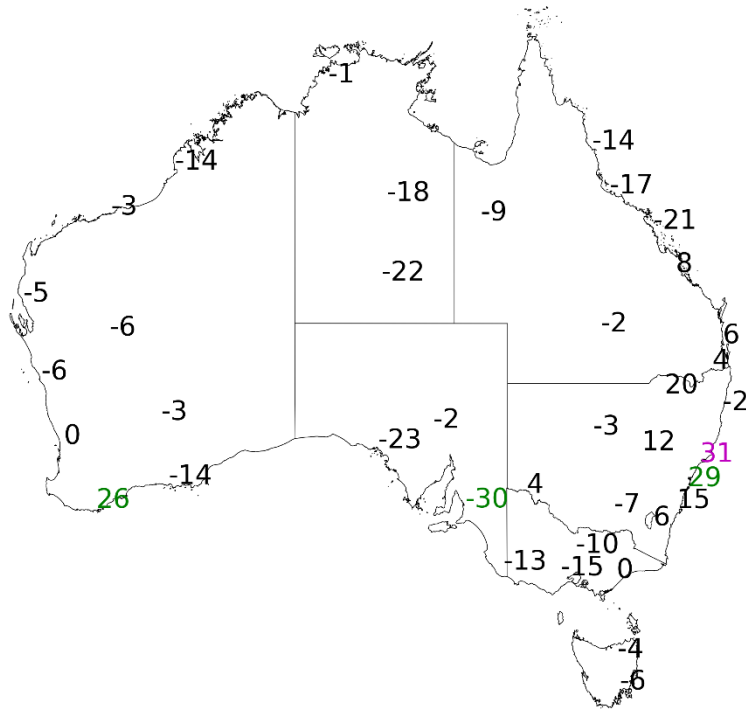

c.

S1 Fig. Partial correlation coefficient values multiplied by 100 for DJF 90<sup>th</sup> percentile FFDI and a. JJA NINO3.4 b. JJA SAM c. JJA IOD (two season lag) (1972 – 2017). Significance greater than 99% in red, 95% in magenta and 90% green.
