# Supplementary material for: Understanding the variability of Australian fire weather between 1973 and 2017
Source: PLOS journal article supplement (doi:10.1371/journal.pone.0222328), 2019-09-19
Supplement: S19 (10.1371/journal.pone.0222328.s019) [file journal.pone.0222328.s019]

SON FFDI90-JJA ENSO partial lag=1

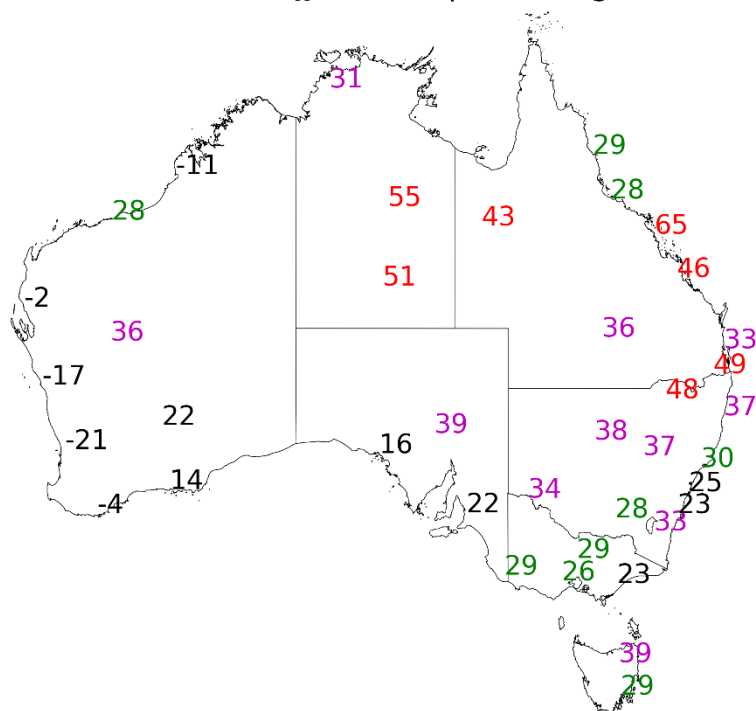

a.

b.

SON FFDI90-JJA SAM partial lag=1

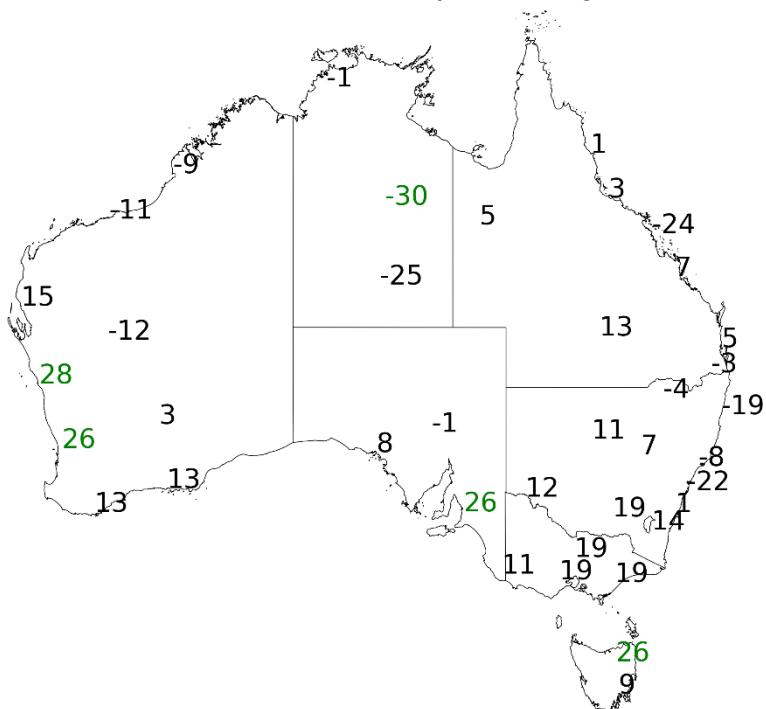

[illegible]

S1 Fig. Partial correlation coefficient values multiplied by 100 for SON 90<sup>th</sup> percentile FFDI and a. JJA NINO3.4 b. JJA SAM c. JJA IOD (one season lag) (1972 – 2017). Significance greater than 99% in red, 95% in magenta and 90% green.
